# Supplementary material for: Hybrid homogeneous/heterogeneous relay catalysis for efficient synthesis of 5-aminomethyl-2-furancarboxylic acid from HMF
Source: Royal Society of Chemistry journal article supplement (doi:10.1039/d4cc02474e), 2024-01-01
Supplement: d4cc02474e1.pdf [file d4cc02474e1.pdf]

**Supplementary information for**  
**Hybrid homogeneous/heterogeneous relay catalysis for efficient synthesis**  
**of 5-aminomethyl-2-furancarboxylic acid from HMF**

Conglin Zhu <sup>a</sup>, Kaizhi Wang <sup>a</sup>, Feifan Gao <sup>a</sup>, Zehui Sun <sup>a</sup>, Mugeng Chen <sup>a</sup>, Jiachen Fei <sup>a</sup>, Chen  
Chen <sup>a</sup>, Heyong He <sup>a</sup>, Yongmei Liu <sup>a,\*</sup>, Yong Cao <sup>a,\*</sup>

<sup>a</sup> Shanghai Key Laboratory of Molecular Catalysis and Innovative Materials, Department of  
Chemistry, Fudan University, Shanghai 200433, China

\* Corresponding author. Email: ymliu@fudan.edu.cn (*Yongmei Liu*), yongcao@fudan.edu.cn  
(*Yong Cao*)

## 1. Experimental Procedures

### 1.1 Chemicals

5-hydroxymethylfurfural (HMF, 99%), 2,5-furandicarboxylic acid (FDCA, 98%), VOSO<sub>4</sub> (97%), Nb<sub>2</sub>O<sub>5</sub> (99.99%), NH<sub>3</sub> in methanol (7M), tetrabutylammonium hydrogen sulfate (TBAHS, 98%), benzyltributylammonium chloride (BTBAC, 98%), and tetramethylammonium hydrogen sulfate (TMAHS, 99%) were supplied by Aladdin Industrial Inc. Tetrabutylammonium chloride (TBAC, 99%) and 5-hydroxymethyl-2-furancarboxylic acid (HMFCFA, 97%) were collected from Shanghai Macklin Biochemical Technology Co., Ltd. 2,5-diformylfuran (DFF, 98%) and 5-formylfuran-2-carboxylic acid (FFCA, 98%) were received from Titan Technology Co., Ltd. Cu(NO<sub>3</sub>)<sub>2</sub>·3H<sub>2</sub>O (99%), acetonitrile (99.8%), methanol (99.7%), nitric acid (65.0%), 1,4-dioxane (99.5%), 1,2-dichloroethane (99.5%), formic acid (99.5%), acetic acid (99%) and cyclohexane (99.7%) were purchased from Sinopharm Chemical Reagent Co., Ltd. Ru(NO)(NO<sub>3</sub>)<sub>3</sub> were supplied by Sigma Aldrich (Shanghai) Trading Co., Ltd. All chemicals were of analytical grade and used as received without further purification.

### 1.2 Characterization

In situ infrared spectroscopy measurements were conducted on a Mettler Toledo's ReactIR 701L instrument equipped with a diamond attenuated total reflectance probe (ATR). The model of the probe is DST series 6.3 mm AgX FiberConduct. The conditions of the solution during scanning are consistent with the reaction conditions.

Inductively coupled plasma-optical emission spectrometry (ICP-OES) was employed to determine the vanadium content in the reaction system using an Agilent 5110 analyzer equipped with a CCD array detector. Sample digestion was carried out in a microwave oven. Subsequently, the vessel was cooled to room temperature and diluted to 50 mL with double-distilled water, prior to the ICP-OES analysis. During the test, the pump rate was 100 r·min<sup>-1</sup>, the nebulizer flow was 0.70 L·min<sup>-1</sup>, the auxiliary gas was 1.0 L·min<sup>-1</sup>, and the sample flush time was 20 s.

Cyclic voltammogram (CV) was recorded on an CHI1140c electrochemical workstation. Using glassy carbon (GC) electrode as the working electrode, platinum wire as the counter electrode, and Ag/AgCl as the reference electrode, CV curves were

determined by three-electrode method. The measurement was conducted in the solution with a scan rate of  $50 \text{ mV}\cdot\text{s}^{-1}$ . The conditions of the solution during scanning are consistent with the reaction conditions.

Room temperature electron spin resonance (ESR) spectra were acquired at 9.8 GHz (X-band) with a Bruker EMX PLUS spectrometer.

X-ray diffraction (XRD) was operated on a Bruker D8 Advance X-ray diffractometer using the Ni-filtered Cu-K $\alpha$  radiation source at 40 kV and 40 mA.

XPS spectra were recorded on a X-ray Photoelectron Spectrometer (Thermo Scientific Ltd.) using a monochromatized Al K $\alpha$  radiation source. The binding energy was calibrated by the C 1s peak at 284.8 eV.

### 1.3 HMF-to-FFCA oxidation and analytical method

Oxidation of HMF was investigated in a 10 mL glass reaction tube with an oxygen balloon. Typically, 5 mmol HMF, 0.1 mmol VOSO<sub>4</sub>, 0.1 mmol Cu(NO<sub>3</sub>)<sub>2</sub> and 0.1 mmol TBAHS were dissolved into 2.5 mL CH<sub>3</sub>CN, and then the reaction was carried out for a certain period of time at a suitable temperature. During the reaction, oxygen balloon continuously provides molecular oxygen for the reaction. After the reaction, the products were diluted with pure water and tested.

Analysis of HMF, DFF, FFCA, and FDCA was made on a Agilent 1260 high-performance liquid chromatography (HPLC) system with an Aminex HPX-87H column (7.8  $\times$  300 mm). Acetonitrile and 0.5 wt% H<sub>2</sub>SO<sub>4</sub> with a volume ratio of 20: 80 were used as mobile phase at a flow rate of  $0.9 \text{ mL}\cdot\text{min}^{-1}$ . The content of HMF, DFF, FFCA and FDCA in the product solution was directly obtained by the calibration curve of external standard constructed by pure substance, and the conversion and selectivity were calculated. HMF conversion, DFF selectivity, FFCA selectivity, FDCA selectivity were defined as follows:

$$\text{Conversion} = \frac{n_{\text{HMF,initial}} - n_{\text{HMF,final}}}{n_{\text{HMF,initial}}} \times 100\% \quad (1)$$

$$\text{Selectivity}_{\text{DFF}} = \frac{n_{\text{DFF,final}}}{n_{\text{DFF,final}} + n_{\text{HMFCa,final}} + n_{\text{FFCA,final}} + n_{\text{FDCA,final}}} \times 100\% \quad (2)$$

$$\text{Selectivity}_{\text{FFCA}} = \frac{n_{\text{FFCA,final}}}{n_{\text{DFF,final}} + n_{\text{HMFCa,final}} + n_{\text{FFCA,final}} + n_{\text{FDCA,final}}} \times 100\% \quad (3)$$

$$\text{Selectivity}_{\text{FDCA}} = \frac{n_{\text{FDCA,final}}}{n_{\text{DFF,final}} + n_{\text{HMFCa,final}} + n_{\text{FFCA,final}} + n_{\text{FDCA,final}}} \times 100\% \quad (4)$$

In a larger-scale reaction, 100 mmol (12.61 g) of HMF were used, with the amounts of VOSO<sub>4</sub>, Cu(NO<sub>3</sub>)<sub>2</sub>, TBAHS, and CH<sub>3</sub>CN scaled accordingly. The mixture was thoroughly stirred to ensure the reaction temperature remained below the set point. HPLC was used to quantify the FFCA formed, with experiments replicated in triplicate, yielding a standard deviation of less than 5%. The reaction mixture was then subjected to rotary evaporation to remove the solvent. The resulting residue was dissolved in an aqueous sodium bicarbonate solution (8.4 g NaHCO<sub>3</sub> in 100 mL H<sub>2</sub>O) and stirred for 10 minutes to convert FFCA into its sodium salt. The solution was filtered to remove insoluble impurities, and the filtrate was acidified with dilute hydrochloric acid (1 mol/L, 100 mL), resulting in the precipitation of FFCA. The pale yellow FFCA powder was eventually recovered by vacuum filtration, resulting in a 96% isolation yield.

#### 1.4 Preparation of Ru/Nb<sub>2</sub>O<sub>5</sub>

In the case of the Ru/Nb<sub>2</sub>O<sub>5</sub> (Ru: 1 wt%) catalyst, Nb<sub>2</sub>O<sub>5</sub> was initially dispersed into aqueous Ru(NO)(NO<sub>3</sub>)<sub>3</sub> solution with stirring and kept overnight. The mixed solution was slowly evaporated at 333 K under 0.01 MPa and then dried at 373 K for 1 h under vacuum conditions. The recovered solid powder was pretreated under 5% H<sub>2</sub>/Ar flow at 673 K for 2 h, and then passivated under air at room temperature before the catalytic reactions.

#### 1.5 Reductive amination of FFCA

Catalytic tests for the reductive amination of carbonyl compounds were operated in a 20 mL Hastelloy-C high pressure Parr reactor. Typically, 20 mg Ru/Nb<sub>2</sub>O<sub>5</sub> catalyst, 0.5 mmol FFCA, 4.14 mL CH<sub>3</sub>OH and 0.86 mL 7 M NH<sub>3</sub>/MeOH solution were loaded into the reactor, and 3 MPa H<sub>2</sub> was then introduced. The reactor was set at 363 K under stirring. Analysis of AMFC was also made on the Agilent 1260 HPLC.

In a larger-scale reaction, 13.45 g of previously isolated FFCA were used, with the amounts of Ru/Nb<sub>2</sub>O<sub>5</sub> and NH<sub>3</sub>/MeOH scaled accordingly. HPLC was used to quantify the AMFC formed, with experiments replicated in triplicate, yielding a standard deviation of less than 5%. After removing the catalyst by filtration, the filtrate was concentrated

using a rotary evaporator to obtain a mixture of AMFC and unreacted FFCA. This mixture was then treated with dilute hydrochloric acid (1 mol/L, 100 mL) to convert AMFC into its ammonium salt. The solution was filtered, and the filtrate was subjected to rotary evaporation to yield pure AMFC. The overall yield of the two-step process was 92%.

Supplementary data (Table S1-S6, Fig. S1-S8)

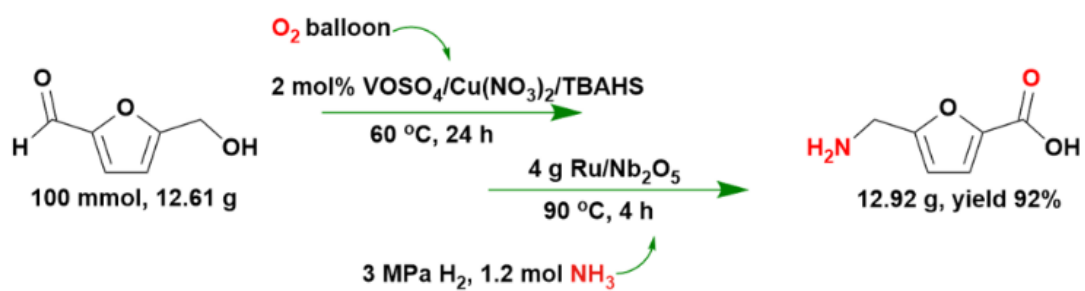

Scheme S1. Up-scaled synthesis of AMFC from HMF.

**Table S1. Dissolution of VOSO<sub>4</sub> at different temperatures with or without TBAHS**

| Entry | Amount of Additive | Temperature (°C) | Concentration of Vanadium (g·L <sup>-1</sup> ) |
|-------|--------------------|------------------|------------------------------------------------|
| 1     | /                  | 25               | 1.053                                          |
| 2     | 0.1 mmol TBAHS     | 25               | 3.592                                          |
| 3     | /                  | 60               | 3.365                                          |
| 4     | 0.1 mmol TBAHS     | 60               | 6.517                                          |

Reaction conditions: 0.1 mmol VOSO<sub>4</sub>, 0.1 mmol TBAHS, 2.5 mL CH<sub>3</sub>CN, concentration of vanadium was measured by ICP-OES.

**Table S2. The influence of Cu(NO<sub>3</sub>)<sub>2</sub> on the solubilization effect of TBAHS**

| Entry | Amount of Cu(NO <sub>3</sub> ) <sub>2</sub> | Concentration of Vanadium (g·L <sup>-1</sup> ) |
|-------|---------------------------------------------|------------------------------------------------|
| 1     | /                                           | 3.592                                          |
| 2     | 0.5 equiv.                                  | 3.608                                          |
| 3     | 1 equiv.                                    | 3.583                                          |
| 4     | 2 equiv.                                    | 3.579                                          |

Reaction conditions: 0.1 mmol VOSO<sub>4</sub>, 0.1 mmol TBAHS, 2.5 mL CH<sub>3</sub>CN, room temperature, concentration of vanadium was measured by ICP-OES.



**Table S3. Oxidation of HMF at different temperatures**

| Entry | Temperature (°C) | Conv. (%) | Select. (%) |      |      |
|-------|------------------|-----------|-------------|------|------|
|       |                  |           | DFE         | FFCA | FDCA |
| 1     | 50               | 100       | 19          | 76   | 5    |
| 2     | 60               | 100       | 9           | 86   | 5    |
| 3     | 70               | 100       | 8           | 83   | 9    |
| 4     | 80               | 100       | 3           | 83   | 14   |

Reaction conditions: 5 mmol HMF, 0.1 mmol VOSO<sub>4</sub>, 0.1 mmol Cu(NO<sub>3</sub>)<sub>2</sub>, 0.1 mmol TBAHS, 2.5 mL CH<sub>3</sub>CN, O<sub>2</sub> balloon, 24 h.

**Table S4. Oxidation of HMF under different pressures**

| Entry | O <sub>2</sub> pressure (bar) | Conv. (%) | Select. (%) |      |      |
|-------|-------------------------------|-----------|-------------|------|------|
|       |                               |           | DFE         | FFCA | FDCA |
| 1     | 1                             | 100       | 9           | 86   | 5    |
| 2     | 3                             | 100       | 10          | 86   | 5    |
| 3     | 5                             | 100       | 8           | 84   | 8    |
| 4     | 10                            | 100       | 8           | 83   | 9    |
| 5     | 20                            | 100       | 7           | 82   | 11   |

Reaction conditions: 5 mmol HMF, 0.1 mmol VOSO<sub>4</sub>, 0.1 mmol Cu(NO<sub>3</sub>)<sub>2</sub>, 0.1 mmol TBAHS, 2.5 mL CH<sub>3</sub>CN, 60 °C, 24 h.

**Table S5. Oxidation of HMF in different mixed solvents**

| Entry | Solvent                   | Conv. (%) | Select. (%) |      |      |
|-------|---------------------------|-----------|-------------|------|------|
|       |                           |           | DFP         | FFCA | FDCA |
| 1     | MeCN:Diox=1:1             | 100       | 14          | 84   | 2    |
| 2     | MeCN:DCE=1:1              | 100       | 9           | 91   | 0    |
| 3     | MeCN:CYH=1:1              | 100       | 70          | 30   | 0    |
| 4     | MeCN:HCOOH=1:1            | 100       | 20          | 69   | 11   |
| 5     | MeCN:AcOH=1:1             | 100       | 49          | 51   | 0    |
| 6     | MeCN:MeOH=1:1             | 30        | 68          | 2    | 0    |
| 7     | MeCN:H <sub>2</sub> O=1:1 | 87        | 93          | 7    | 0    |
| 8     | MeCN:DCE=2:1              | 100       | 3           | 97   | 0    |
| 9     | MeCN:DCE=1:2              | 100       | 33          | 65   | 0    |

Reaction conditions: 5 mmol HMF, 0.1 mmol VOSO<sub>4</sub>, 0.1 mmol Cu(NO<sub>3</sub>)<sub>2</sub>, 0.1 mmol TBAHS, 2.5 mL solvent, 60 °C, O<sub>2</sub> balloon, 24 h.

**Table S6. Comparison of reported FFCA preparation methods**

| Entry          | Catalyst                                                                         | C <sub>HMF</sub><br>(mol/L) | T<br>(°C) | t<br>(h) | p<br>(MPa) | Addition                        | FFCA<br>Yield<br>(%) |
|----------------|----------------------------------------------------------------------------------|-----------------------------|-----------|----------|------------|---------------------------------|----------------------|
| 1              | VOSO <sub>4</sub> /Cu(NO <sub>3</sub> ) <sub>2</sub> /TBAHS                      | 2                           | 60        | 24       | 0.1        | /                               | 97                   |
| 2 <sup>1</sup> | CuO·CeO <sub>2</sub>                                                             | 0.2                         | 110       | 3        | 0.9        | /                               | 90                   |
| 3 <sup>2</sup> | MgO·CeO <sub>2</sub>                                                             | 0.14                        | 130       | 9        | 0.9        | /                               | 90                   |
| 4 <sup>3</sup> | AuNP-sPSB                                                                        | 0.06                        | 110       | 16       | 0.1        | Cs <sub>2</sub> CO <sub>3</sub> | 74                   |
| 5 <sup>4</sup> | Na <sub>3</sub> H <sub>6</sub> FeMo <sub>6</sub> O <sub>24</sub>                 | 0.2                         | 100       | 8        | 0.1        | K <sub>2</sub> CO <sub>3</sub>  | 75                   |
| 6 <sup>5</sup> | Mn <sub>3</sub> Fe <sub>7</sub>                                                  | 0.05                        | 140       | 3        | 3          | Na <sub>2</sub> CO <sub>3</sub> | 36                   |
| 7 <sup>6</sup> | (NH <sub>4</sub> ) <sub>3</sub> H <sub>6</sub> CoMo <sub>6</sub> O <sub>24</sub> | 0.02                        | 130       | 6        | 0.1        | /                               | 60                   |
| 8 <sup>7</sup> | CotA-TJ102                                                                       | 0.05                        | 55        | 12       | 0.1        | CH <sub>3</sub> COONa,<br>TEMPO | 98                   |

**Table S7. Effect of temperature on the yield of AMFC over Ru/Nb<sub>2</sub>O<sub>5</sub>**

| Entry | Temperature (°C) | AMFC yield (%) |
|-------|------------------|----------------|
| 1     | 60               | 0              |
| 2     | 90               | 97             |
| 3     | 120              | 76             |

Reaction conditions: 0.02 g catalyst, 0.5 mmol FFCA, 5 mL MeOH, 6 mmol NH<sub>3</sub>, 3 MPa H<sub>2</sub>, 4 h.

**Table S8. Effect of substrate/ammonia ratio on the yield of AMFC over Ru/Nb<sub>2</sub>O<sub>5</sub>**

| Entry | Amount of NH <sub>3</sub> (mmol) | AMFC yield (%) |
|-------|----------------------------------|----------------|
| 1     | 2                                | 61             |
| 2     | 4                                | 77             |
| 3     | 6                                | 97             |
| 4     | 8                                | 96             |

Reaction conditions: 0.02 g catalyst, 0.5 mmol FFCA, 5 mL MeOH, 3 MPa H<sub>2</sub>, 90 °C, 4 h.

**Table S9. Comparison of reported AMFC preparation methods**

| Entry           | Substrate                                                                         | Catalyst                          | C <sub>substrate</sub><br>(mol/L) | Ammonia<br>source                                                                   | AMFC<br>Yield (%) |
|-----------------|-----------------------------------------------------------------------------------|-----------------------------------|-----------------------------------|-------------------------------------------------------------------------------------|-------------------|
| 1               | 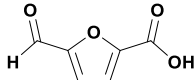 | Ru/Nb <sub>2</sub> O <sub>5</sub> | 0.2                               | NH <sub>3</sub>                                                                     | 96                |
| 2 <sup>8</sup>  |  | Cs <sub>2</sub> CO <sub>3</sub>   | /                                 | /                                                                                   | 62                |
| 3 <sup>9</sup>  |  | TAs                               | 0.01                              |  | 44-89             |
| 4 <sup>10</sup> |  | Immobilized<br>CvTA               | 0.01                              |  | 77                |
| 5 <sup>11</sup> |  | <i>E.coli</i> _TAF cells          | 0.15                              | HCOONH <sub>4</sub>                                                                 | 81                |

**Table S10. Reductive Amination of furan aldehyde with ammonia.**

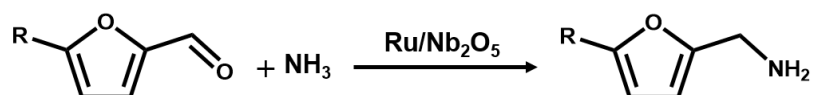

| Entry | Substrate | Yield (%) |
|-------|-----------|-----------|
| 1     |           | 69        |
| 2     |           | 63        |
| 3     |           | 78        |

Reaction conditions: 0.02 g catalyst, 0.5 mmol substrate, 5 mL MeOH, 6 mmol NH<sub>3</sub>, 3 MPa H<sub>2</sub>, 90 °C, 4 h.



**Table S11. Reductive Amination of FFCA with primary amines.**

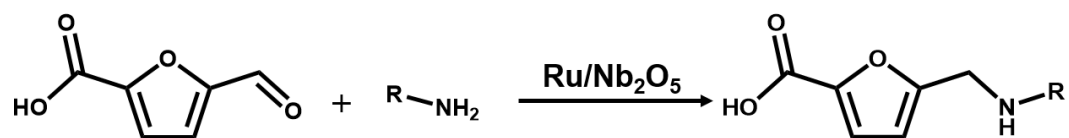

| Entry | R-NH <sub>2</sub> | Yield (%) |
|-------|-------------------|-----------|
| 1     |                   | 72        |
| 2     |                   | 89        |
| 3     |                   | 88        |

Reaction conditions: 0.02 g catalyst, 0.5 mmol FFCA, 5 mL MeOH, 6 mmol R-NH<sub>2</sub>, 3 MPa H<sub>2</sub>, 90 °C, 4 h.

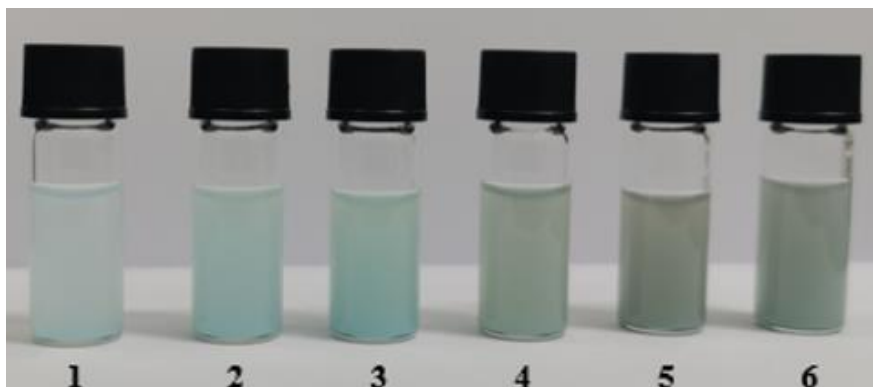

**Figure S1. The color of the system changes after adding different amounts of TBAHS.**

Reaction conditions: 0.1 mmol  $\text{VO}_2^+$ , 2.5 mL  $\text{CH}_3\text{CN}$ , stir for 30 minutes. 1, without addition; 2, 0.02 mmol TBAHS; 3, 0.03 mmol TBAHS; 4, 0.05 mmol TBAHS; 5, 0.1 mmol TBAHS; 6, 0.2 mmol TBAHS.

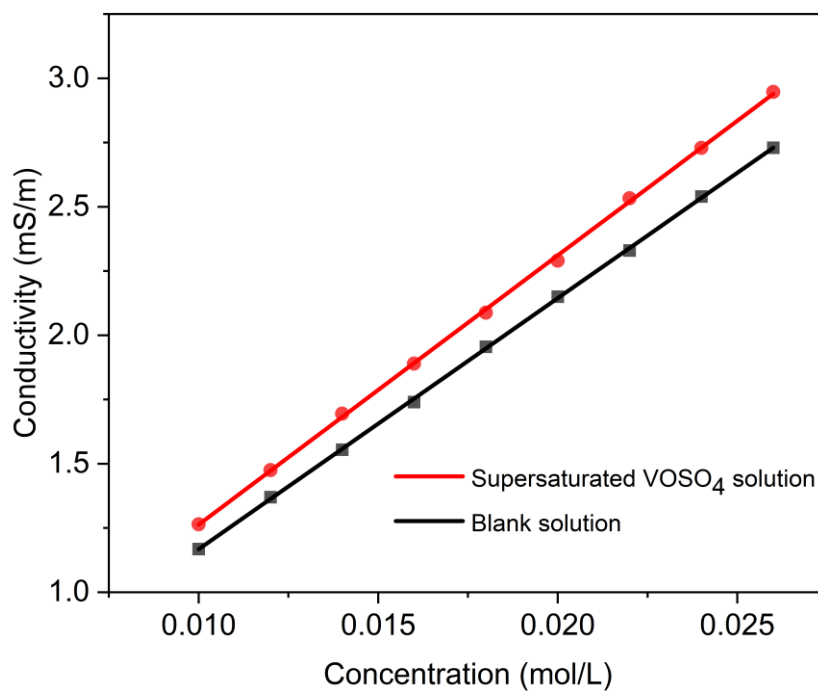

**Figure S2. The conductivity test.**

Add an equal amount of TBAHS to the supersaturated VOSO<sub>4</sub> solution and acetonitrile and then measure the conductivity of the solution. The discernible rise in conductivity in the supersaturated solution, relative to the blank solution, suggests the solubilization of TBAHS.

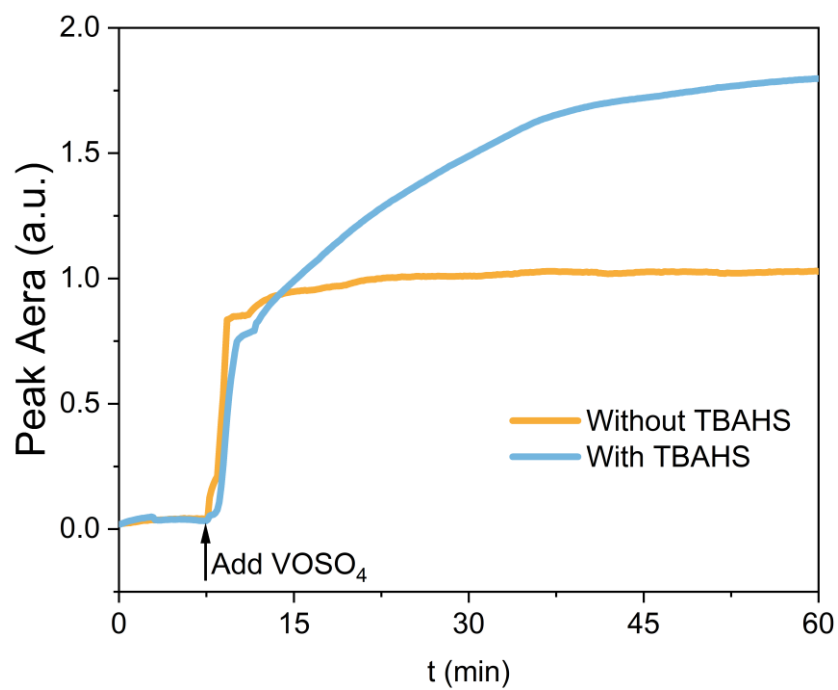

**Figure S3. Relationship of peak area and reaction time.**

Reaction conditions: 5mmol DFF, 0.1 mmol VOSO<sub>4</sub>, 0.1 mmol Cu(NO<sub>3</sub>)<sub>2</sub>, 2.5 mL CH<sub>3</sub>CN, 60 °C, O<sub>2</sub> balloon.

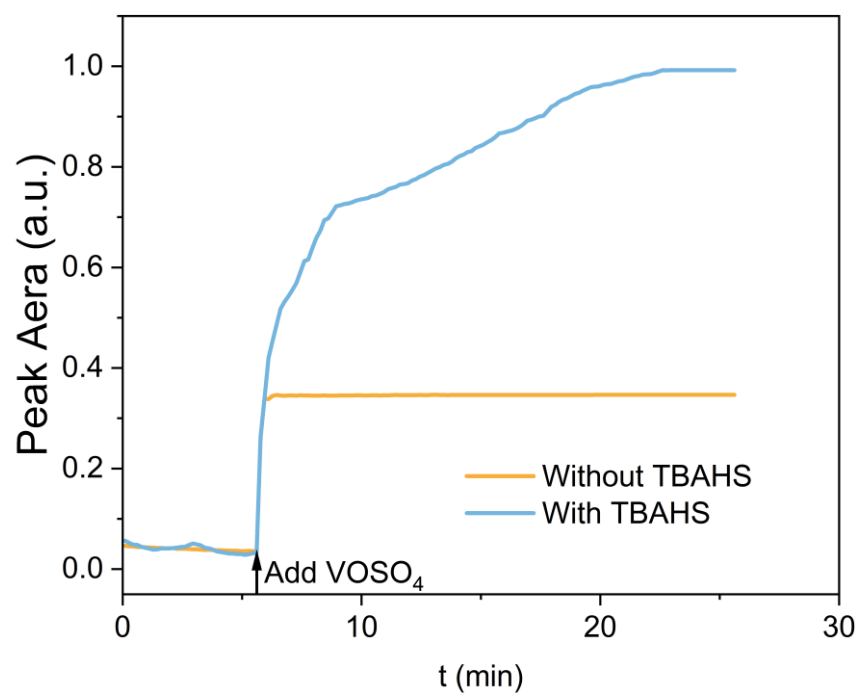

**Figure S4. Relationship of peak area and reaction time.**

Reaction conditions: 5mmol DFF, 0.1 mmol VOSO<sub>4</sub>, 0.1 mmol Cu(NO<sub>3</sub>)<sub>2</sub>, 2.5 mL CH<sub>3</sub>CN, room temperature, O<sub>2</sub> balloon.

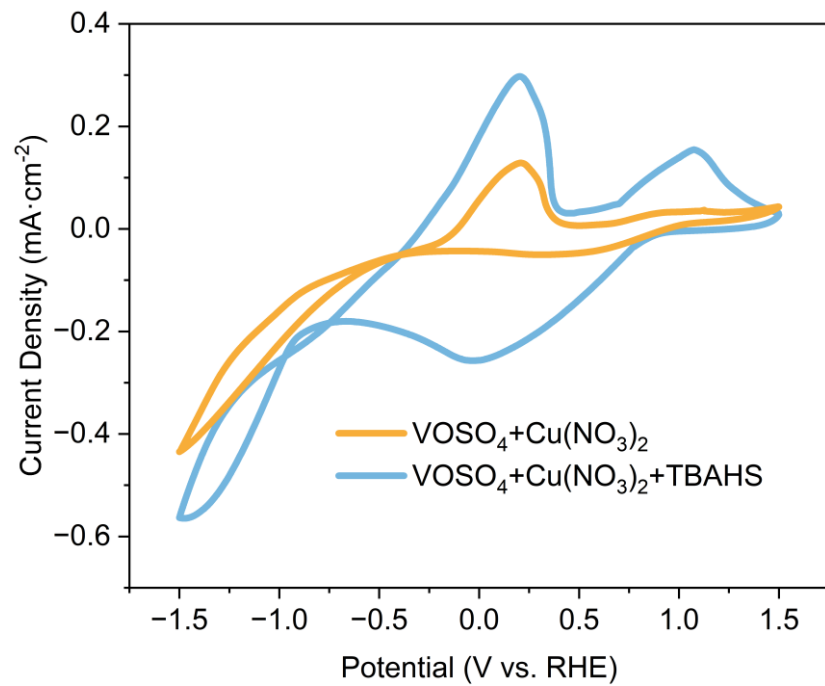

**Figure S5. Cyclic voltammetry test.**

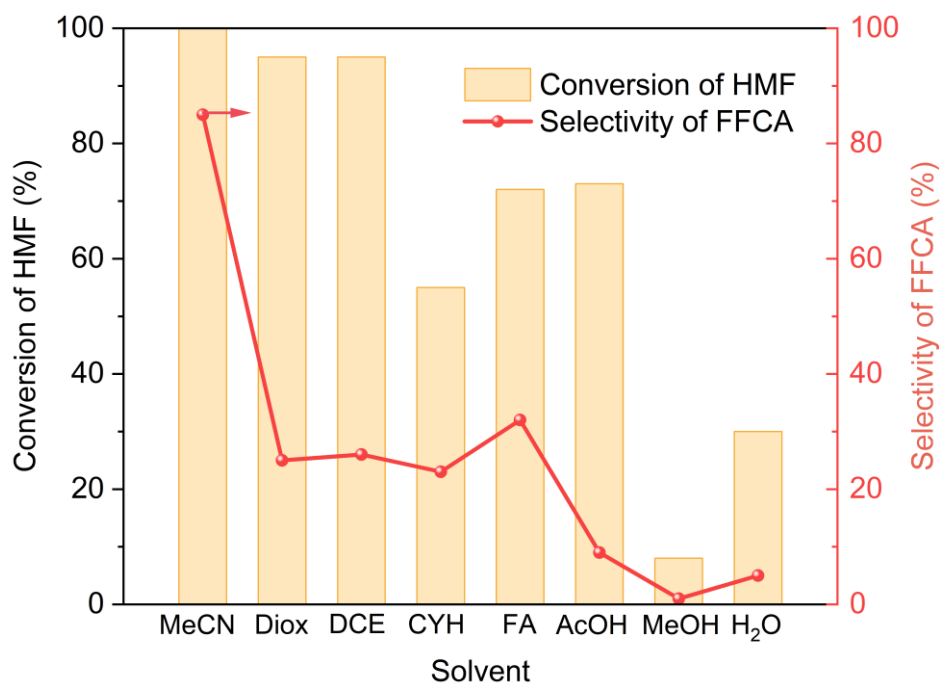

**Figure S6. The dependence of HMF conversion or FFCA selectivity on solvent.**

Reaction conditions: 5 mmol HMF, 0.1 mmol VOSO<sub>4</sub>, 0.1 mmol Cu(NO<sub>3</sub>)<sub>2</sub>, 2.5 mL CH<sub>3</sub>CN, 60 °C, O<sub>2</sub> balloon, 24 h.

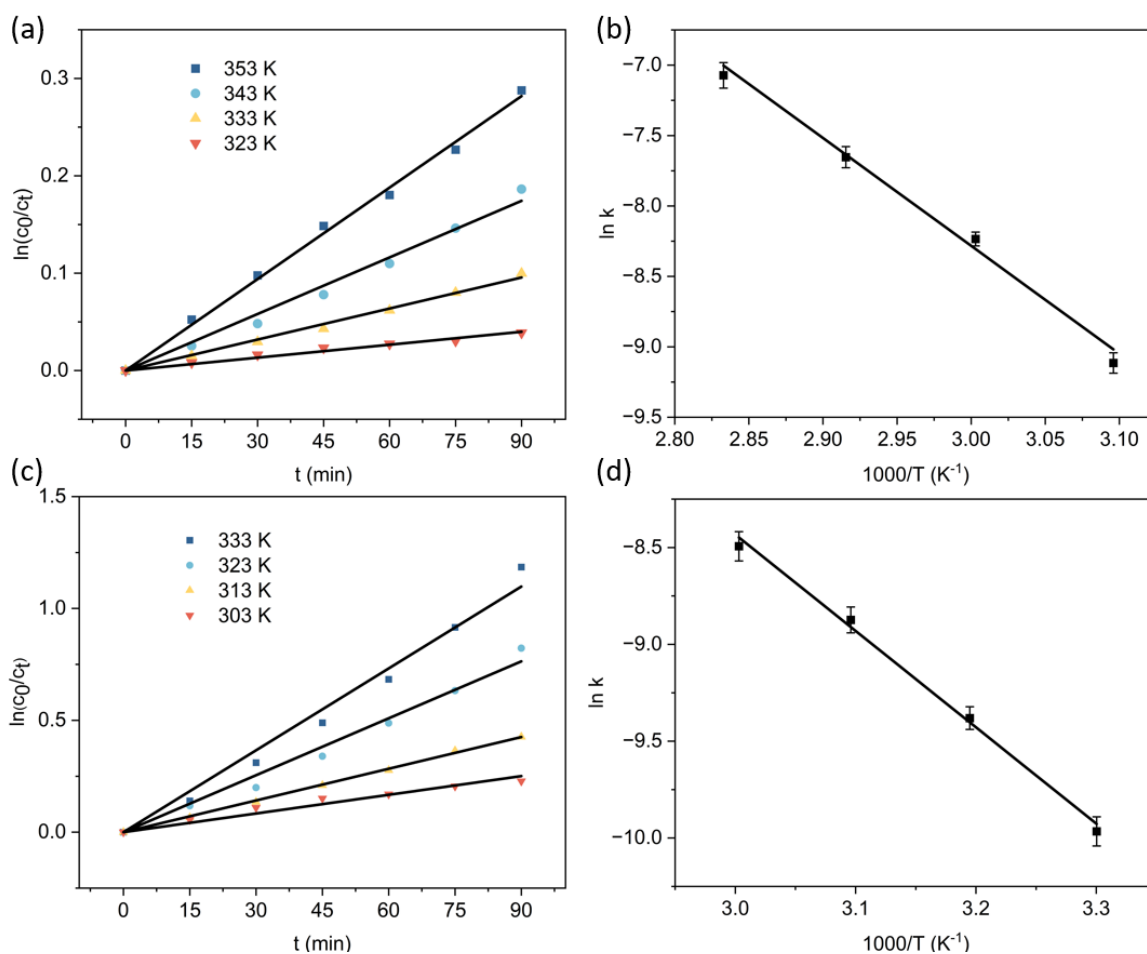

**Figure S7. (a) Relationship of  $\ln(C_0/C_t)$  and reaction time of DFF oxidation to FFCA. (b) Arrhenius plot for the oxidation of DFF. (c) Relationship of  $\ln(C_0/C_t)$  and reaction time of HMF oxidation to DFF. (d) Arrhenius plot for the oxidation of HMF.**

Reaction conditions: 5 mmol HMF or DFF, 0.1 mmol  $VOSO_4$ , 0.1 mmol  $Cu(NO_3)_2$ , 0.1 mmol TBAHS, 2.5 mL  $CH_3CN$ ,  $O_2$  balloon.



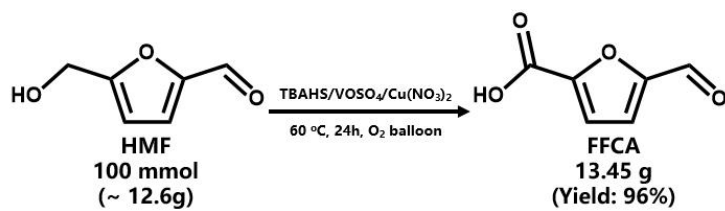

(a)

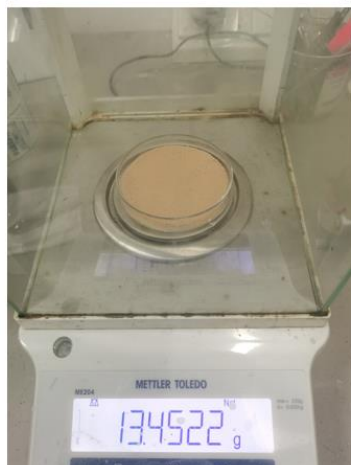

(b)

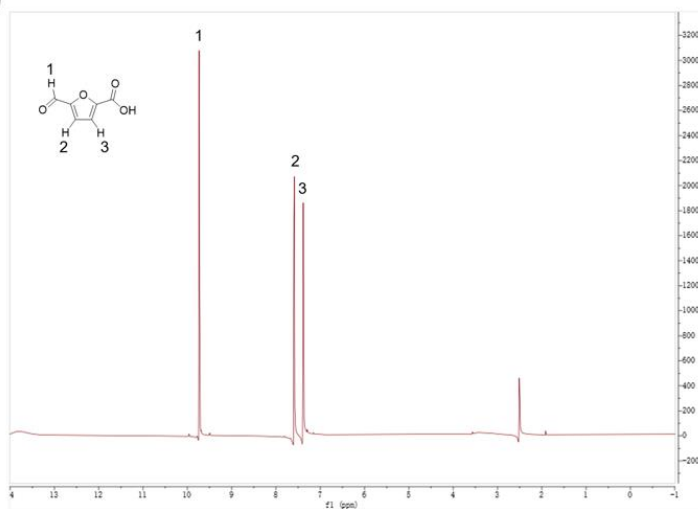

**Figure S8. (a) Isolated FFCA product. (b)  $^1\text{H}$  NMR spectrum of the isolated FFCA product.**

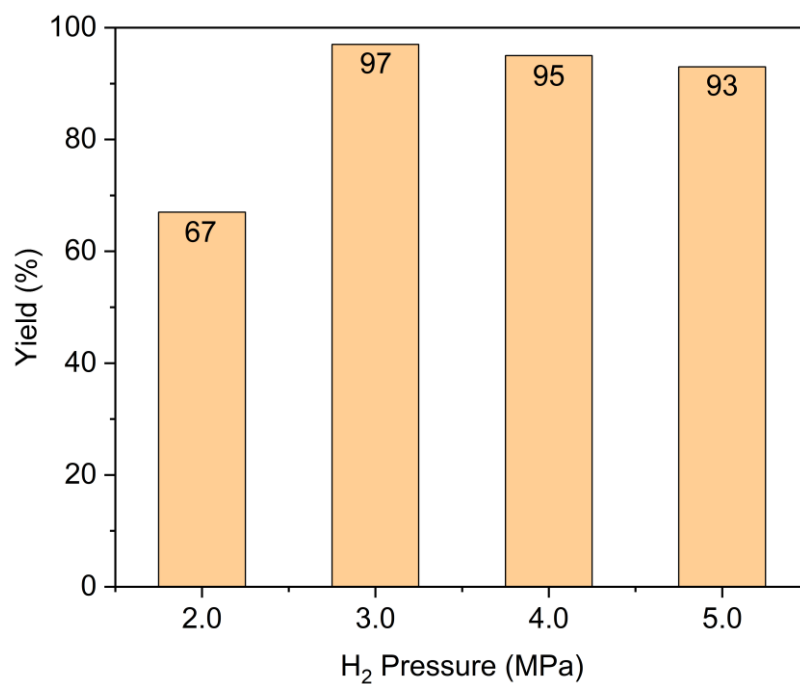

**Fig. S9 Effect of hydrogen pressure on the yield of AMFC over Ru/Nb<sub>2</sub>O<sub>5</sub>**

Reaction conditions: 0.02 g catalyst, 0.5 mmol FFCA, 5 mL MeOH, 8 mmol NH<sub>3</sub>, specified pressure H<sub>2</sub>, 90 °C, 4 h.

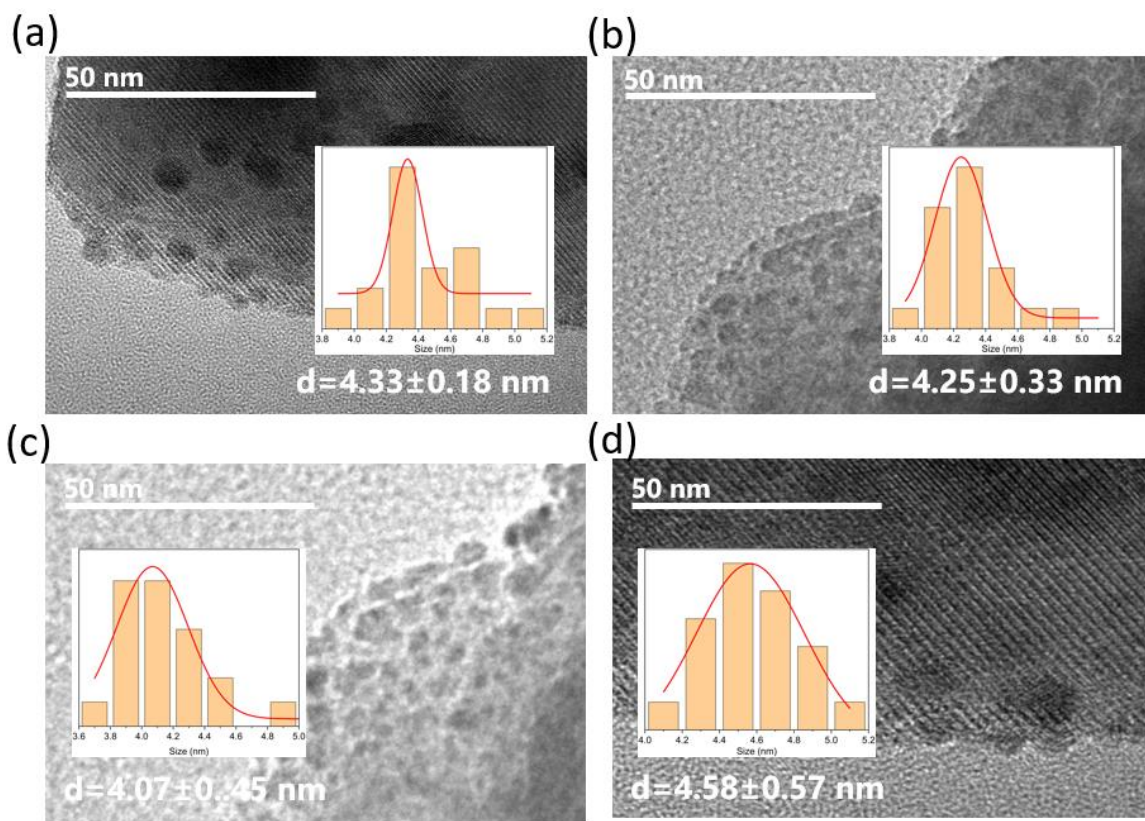

**Fig. S10 TEM of (a) Ru/Nb<sub>2</sub>O<sub>5</sub>, (b) Ru/SiO<sub>2</sub>, (c) Ru/Al<sub>2</sub>O<sub>3</sub>, (d) Ru/ZrO<sub>2</sub>**

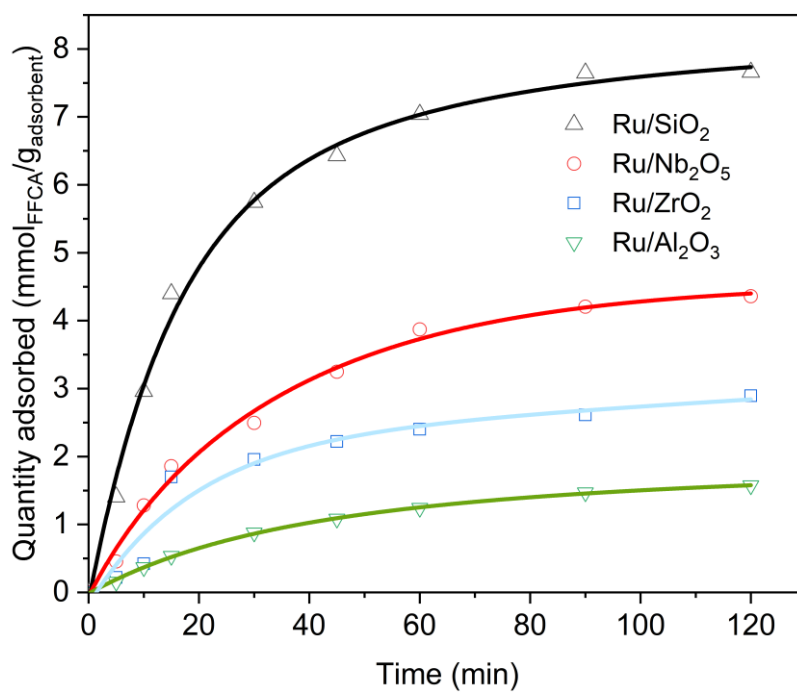

**Fig. S11 Adsorption kinetics of FFCA in Ru-based catalysts**

Reaction conditions: 0.02 g catalyst, 1 mmol FFCA, 5 mL MeOH.

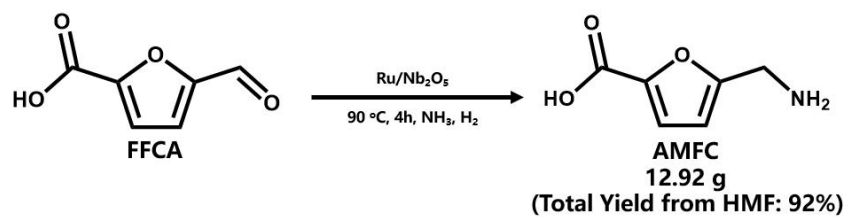

(a)

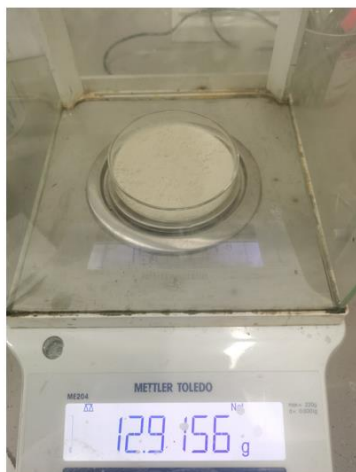

(b)

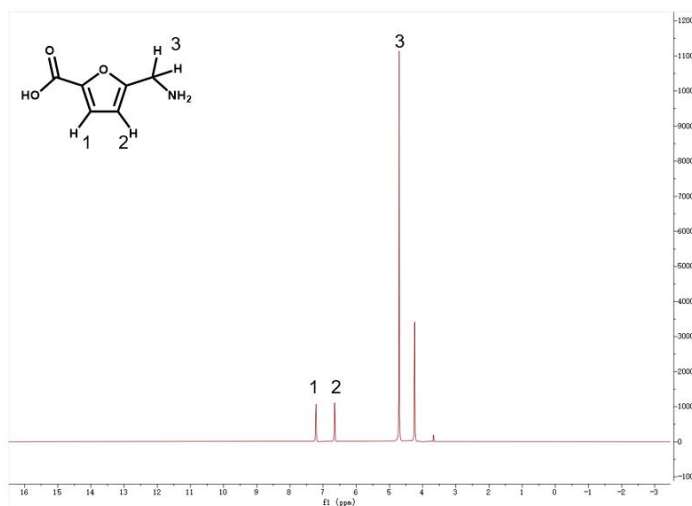

**Figure S12. (a) Isolated AMFC product. (b)  $^1\text{H}$  NMR spectrum of the isolated AMFC product.**

## References:

1. M. Ventura, M. Aresta and A. Dibenedetto, *ChemSusChem*, 2016, **9**, 1096-1100.
2. M. Ventura, F. Lobefaro, E. de Giglio, M. Distaso, F. Nocito and A. Dibenedetto, *ChemSusChem*, 2018, **11**, 1305-1315.
3. A. Buonerba, S. Impemba, A. D. Litta, C. Capacchione, S. Milione and A. Grassi, *ChemSusChem*, 2018, **11**, 3139-3149.
4. J. J. Xu, Z. G. Zhu, Z. L. Yuan, T. Su, Y. C. Zhao, W. Z. Ren, Z. H. Zhang and H. Y. Lü, *J. Taiwan Inst. Chem. E.*, 2019, **104**, 8-15.
5. P. Pal, S. Kumar, M. M. Devi and S. Saravanamurugan, *J. Supercrit. Fluids*, 2020, **160**, 104812.
6. Y. B. Sun, K. X. Yang, Z. G. Zhu, T. Su, W. Z. Ren and H. Y. Lu, *Chem. Commun.*, 2022, **58**, 8105-8108.
7. C. Y. Zhang, X. Chang, L. Zhu, Q. G. Xing, S. P. You, W. Qu, R. X. Su and Z. M. He, *Int. J. Biol. Macromol.*, 2019, **128**, 132-139.
8. A. W. Lanckenau and M. W. Kanan, *Chem. Sci.*, 2020, **11**, 248-252.
9. A. Dunbabin, F. Subrizi, J. M. Ward, T. D. Sheppard, H. C. Hailes, *Green Chem.*, 2017, **19**, 397-404.
10. A. Lancien, R. Wojcieszak, E. Cuvelier, M. Duban, P. Dhulster, S. Paul, F. Dumeignil, R. Froidevaux, E. Heuson, *ChemCatChem*, 2021, **13**, 247-259.
11. Z. C. Wu, W. W. Li, M. H. Zong and N. Li, *Chem. Eur. J.*, 2024, **30**, e202400269.
